# Supplementary material for: Evolutionary pressures on simple sequence repeats in prokaryotic coding regions
Source: PubMed Central journal article supplement — Nucleic Acids Res. 2011 Nov 26;40(6):2399–413. doi: 10.1093/nar/gkr1078 (PMC3315296; doi:10.1093/nar/gkr1078), 2011-11-26

## Supplementary Figure and Table Captions

**Table S1:** Overall statistics of species' sequences, SSRs, and indels across the genomes analyzed. Columns give the species abbreviation, name, number of fully-sequenced strains analyzed, the total length of homologous coding sequence that was analyzed (the total length of all alignments), the number of SSR loci identified, the total number of SSR-associated indels, and the number of indels per SSR locus.

**Figure S1:** Observed vs. expected SSR frequency statistics for different species and motif types. (A) Ratio of observed vs. expected SSR frequency estimated by global synonymous codon shuffling. Each square represents the value of the ratio for a given SSR type and species. Over- and under-represented types are shown respectively in yellow and blue shades. (B) Cumulative statistics for each SSR type. See Table 1 for the prokaryotic species names.

**Figure S2A and S2B:** Symmetric/anti-symmetric decomposition of SSR density. (A) Symmetric components of original SSR density (blue curves) and local synonymous codon-shuffled SSR density (red curves). (B) Anti-symmetric components of original SSR density (blue curves) and local synonymous codon-shuffled SSR density (red curves). Note that for each species, symmetric and anti-symmetric component curves are all normalized by average SSR frequency of local shuffled genome.

**Figure S3:** Positional dependence of SSR density, using stringent length cutoff (see Supplementary Methods). For each plot, the x-axis represents binned positions from N→C termini, and the y-axis indicates the SSR density (# SSRs / kb). Blue curves: original SSR density. Green curves: SSR density in global synonymous codon shufflings. Red curves: SSR density in local synonymous codon shufflings. Error bars represent the standard error of the estimated SSR density observed in the shuffled sequences.

**Figure S4A and S4B:** Symmetric/anti-symmetric decomposition of SSR density, using stringent length cutoff (see Supplementary Methods). Same color scheme was used as in Figure S2.

**Figure S5:** Flow chart describing procedure to generate local and global codon shuffling of CDS, used as null models for testing selective pressures on SSR density.

**Table S1**

| Abbr. | Species name                      | # of strains | homologous CDS | # of SSR | # of indel | indel events  |                                   | Taxonomy |
|-------|-----------------------------------|--------------|----------------|----------|------------|---------------|-----------------------------------|----------|
|       |                                   | analyzed     | length (bp)    | loci     | events     | per SSR locus |                                   |          |
| Ab    | <i>Acinetobacter baumannii</i>    | 6            | 3583306        | 13512    | 208        | 0.0154        | gamma-proteo.; Pseudomonadales    |          |
| Ban   | <i>Bacillus anthracis</i>         | 6            | 4765573        | 23521    | 297        | 0.0126        | Firmicutes; Bacillales            |          |
| Bc    | <i>Bacillus cereus</i>            | 10           | 5585495        | 49981    | 972        | 0.0194        | Firmicutes; Bacillales            |          |
| Bl    | <i>Bifidobacterium longum</i>     | 4            | 2211423        | 7382     | 86         | 0.0116        | Actinobacteria; Bifidobacteriales |          |
| Bap   | <i>Buchnera aphidicola</i>        | 5            | 575267         | 14912    | 651        | 0.0437        | gamma-proteo.; Enterobacteriales  |          |
| Bcn   | <i>Burkholderia cenocepacia</i>   | 4            | 6776765        | 53827    | 424        | 0.0079        | beta-proteo.; Burkholderiales     |          |
| Bm    | <i>Burkholderia mallei</i>        | 4            | 5028909        | 47444    | 342        | 0.0072        | beta-proteo.; Burkholderiales     |          |
| Bp    | <i>Burkholderia pseudomallei</i>  | 5            | 6599508        | 63839    | 1042       | 0.0163        | beta-proteo.; Burkholderiales     |          |
| Cj    | <i>Campylobacter jejuni</i>       | 5            | 1638518        | 15145    | 194        | 0.0128        | epsion-proteo. ;Campylobacteria   |          |
| CSm   | <i>Candidatus Sulcia muelleri</i> | 4            | 262508         | 7376     | 536        | 0.0727        | Bacteroidetes; flavobacteria      |          |
| Ct    | <i>Chlamydia trachomatis</i>      | 6            | 946013         | 5949     | 39         | 0.0066        | Chlamydiae                        |          |
| Cpn   | <i>Chlamydomydia pneumoniae</i>   | 4            | 1112526        | 5348     | 8          | 0.0015        | Chlamydiae                        |          |
| Cbo   | <i>Clostridium botulinum</i>      | 10           | 5113611        | 58030    | 877        | 0.0151        | Firmicutes; Clostridiales         |          |
| Cbu   | <i>Coxiella burnetii</i>          | 5            | 1790675        | 9577     | 151        | 0.0158        | gamma-proteo.; Legionellales      |          |
| CP    | <i>Cynotheca PCC</i>              | 5            | 5658602        | 41385    | 516        | 0.0125        | Cyanobacteria                     |          |
| Ec    | <i>Escherichia coli</i>           | 30           | 6736504        | 36432    | 2351       | 0.0645        | gamma-proteo.; Enterobacteriales  |          |
| Ft    | <i>Francisella tularensis</i>     | 8            | 1643566        | 10461    | 180        | 0.0172        | gamma-proteo.; Thiotrichales      |          |
| Hi    | <i>Haemophilus influenzae</i>     | 4            | 1649625        | 7616     | 154        | 0.0202        | gamma-proteo.; Pasteurellales     |          |
| Hp    | <i>Helicobacter pylori</i>        | 10           | 1662741        | 18056    | 683        | 0.0378        | epsion-proteo. ;Campylobacteria   |          |
| Ll    | <i>Lactococcus lactis</i>         | 4            | 2114417        | 13614    | 165        | 0.0121        | Firmicutes; Lactobacillales       |          |
| Lp    | <i>Legionella pneumophila</i>     | 5            | 3242761        | 17885    | 108        | 0.0060        | gamma-proteo.; Legionellales      |          |
| Lm    | <i>Listeria monocytogenes</i>     | 6            | 2839101        | 16074    | 106        | 0.0066        | Firmicutes; Bacillales            |          |

|     |                                    |    |         |       |      |        |                                  |
|-----|------------------------------------|----|---------|-------|------|--------|----------------------------------|
| Mm  | <i>Methanococcus maripaludis</i>   | 4  | 1507985 | 15206 | 132  | 0.0087 | Archaea                          |
| Mt  | <i>Mycobacterium tuberculosis</i>  | 5  | 4118934 | 13388 | 45   | 0.0034 | Actinobacteria; Actinomycetales  |
| Nm  | <i>Neisseria meningitidis</i>      | 5  | 1843651 | 9445  | 133  | 0.0141 | beta-proteo.; Nesseriales        |
| Pm  | <i>Prochlorococcus marinus</i>     | 12 | 3257772 | 42443 | 1067 | 0.0251 | Cyanobacteria                    |
| Pa  | <i>Pseudomonas aeruginosa</i>      | 4  | 5758814 | 28673 | 204  | 0.0071 | gamma-proteo.; Pseudomonadales   |
| Pp  | <i>Pseudomonas putida</i>          | 4  | 5150324 | 25859 | 176  | 0.0068 | gamma-proteo.; Pseudomonadales   |
| Rs  | <i>Rhodobacter sphaeroides</i>     | 4  | 4077709 | 30677 | 360  | 0.0117 | alpha-proteo.; Rhodobacteriales  |
| Rp  | <i>Rhodopseudomonas palustris</i>  | 6  | 5470313 | 55145 | 2029 | 0.0368 | alpha-proteo.; Rhizobiales       |
| Se  | <i>Salmonella enterica</i>         | 15 | 4995231 | 25638 | 338  | 0.0132 | gamma-proteo.; Enterobacteriales |
| Sb  | <i>Shewanella baltica</i>          | 4  | 4402143 | 13246 | 79   | 0.0060 | gamma-proteo.; Alteromonadales   |
| Sa  | <i>Staphylococcus aureus</i>       | 15 | 2704147 | 14565 | 197  | 0.0135 | Firmicutes; Bacillales           |
| Spn | <i>Streptococcus pneumoniae</i>    | 14 | 2281593 | 10203 | 233  | 0.0228 | Firmicutes; Lactobacillales      |
| Spy | <i>Streptococcus pyogenes</i>      | 13 | 1901778 | 9242  | 193  | 0.0209 | Firmicutes; Lactobacillales      |
| Ss  | <i>Streptococcus suis</i>          | 5  | 1869382 | 5824  | 25   | 0.0043 | Firmicutes; Lactobacillales      |
| Si  | <i>Sulfolobus islandicus</i>       | 7  | 2545336 | 12544 | 169  | 0.0135 | Archaea                          |
| Vc  | <i>Vibrio cholerae</i>             | 4  | 3595367 | 11497 | 25   | 0.0022 | gamma-proteo.; Vibrionales       |
| Xc  | <i>Xanthomonas campestris</i>      | 4  | 4486353 | 30687 | 334  | 0.0109 | gamma-proteo.; Xanthomonadales   |
| Xf  | <i>Xylella fastidiosa</i>          | 4  | 2081769 | 8333  | 158  | 0.0190 | gamma-proteo.; Xanthomonadales   |
| Ype | <i>Yersinia pestis</i>             | 8  | 4032200 | 12564 | 125  | 0.0099 | gamma-proteo.; Enterobacteriales |
| Yps | <i>Yersinia pseudotuberculosis</i> | 4  | 3997610 | 13211 | 84   | 0.0064 | gamma-proteo.; Enterobacteriales |

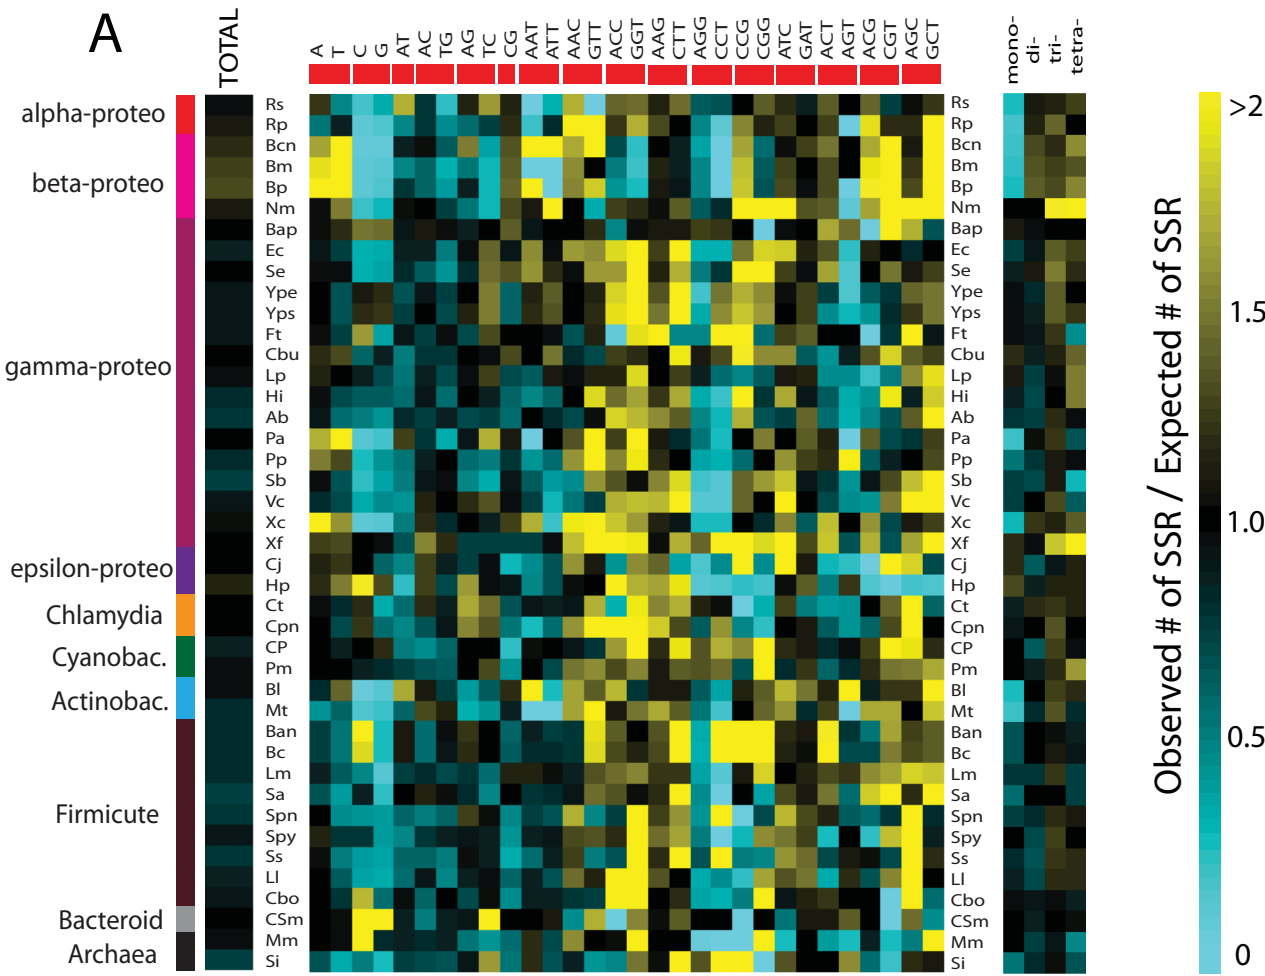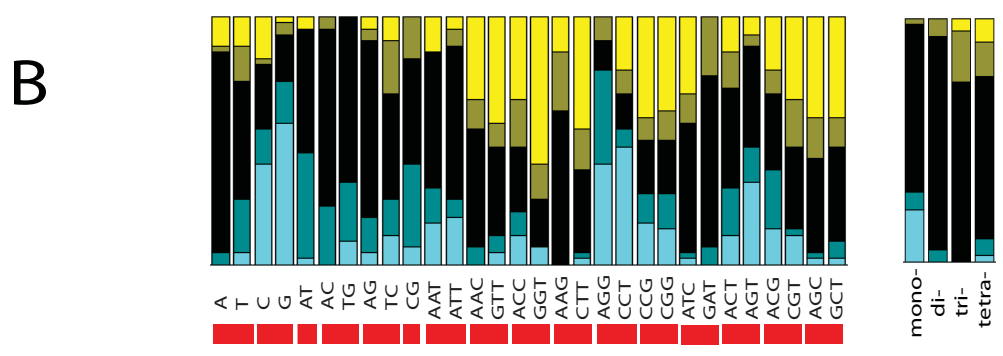

Supplemental Figure 2A

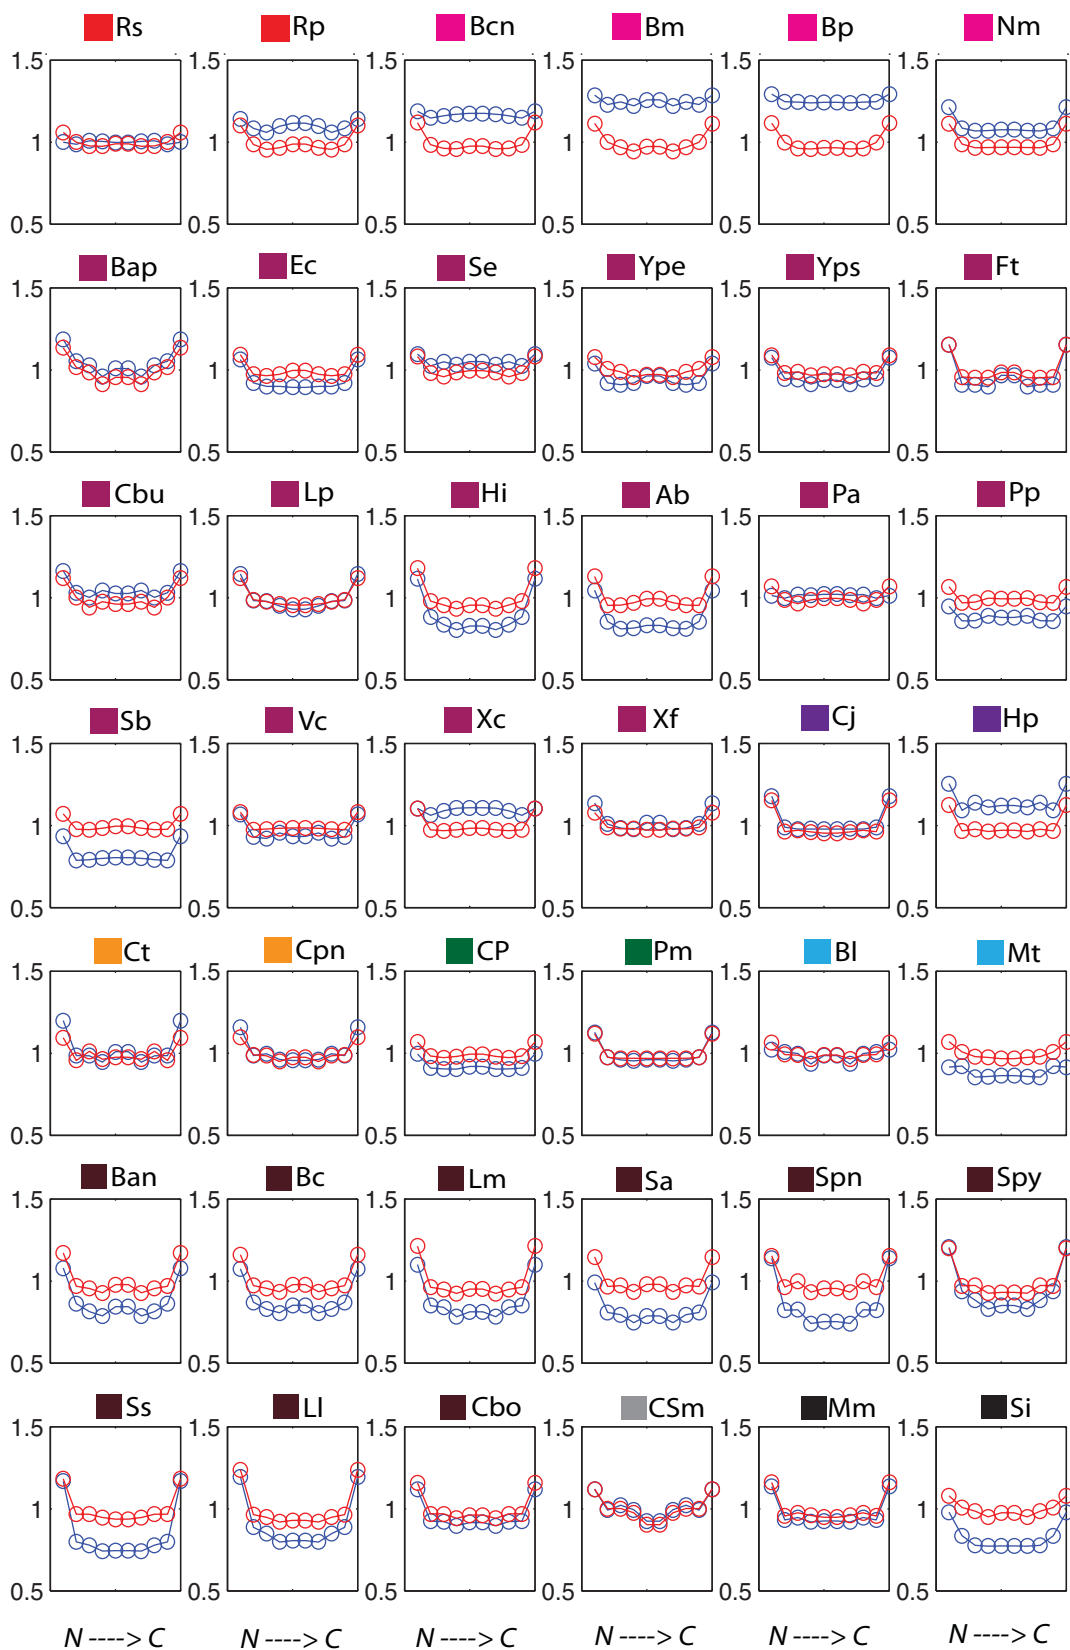

■ alpha-proteo  
■ beta-proteo  
■ gamma-proteo  
■ epsilon-proteo

■ Chlamydia  
■ Cyanobac.  
■ Actinobac.

■ Firmicute  
■ Bacteroid  
■ Archaea

Supplemental Figure 2B

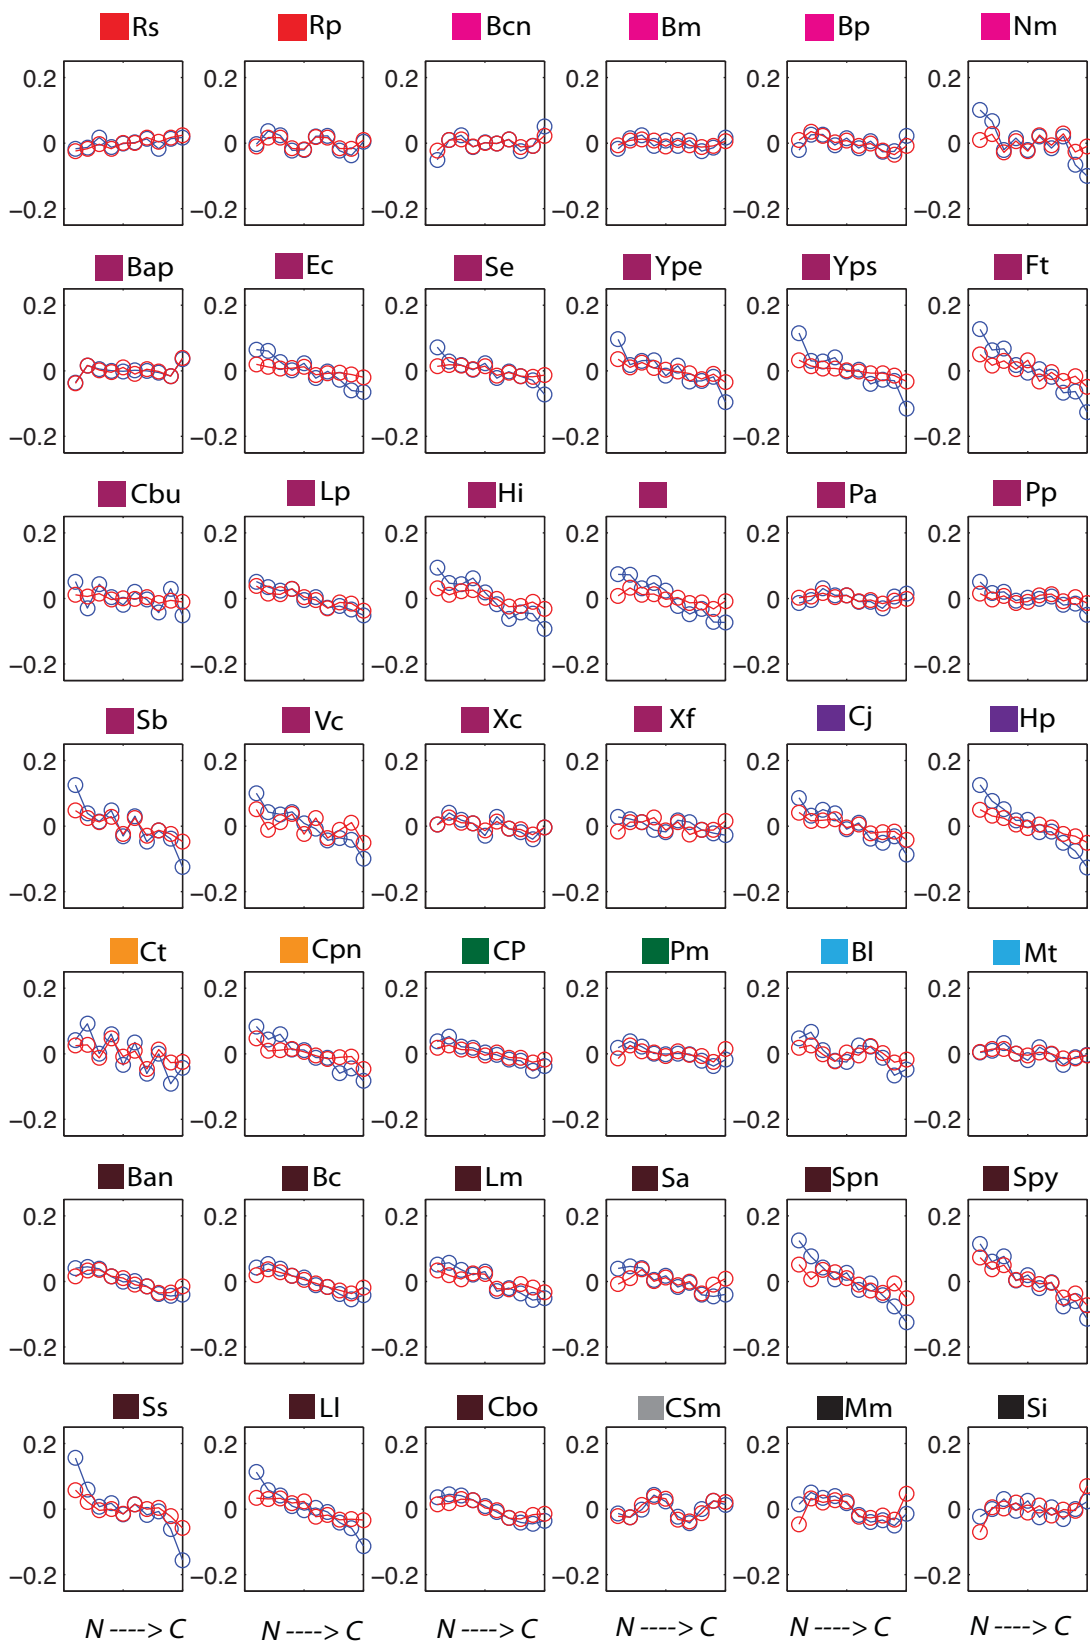

■ alpha-proteo  
■ beta-proteo  
■ gamma-proteo  
■ epsilon-proteo

■ Chlamydia  
■ Cyanobac.  
■ Actinobac.

■ Firmicute  
■ Bacteroid  
■ Archaea

Supplemental Figure 3

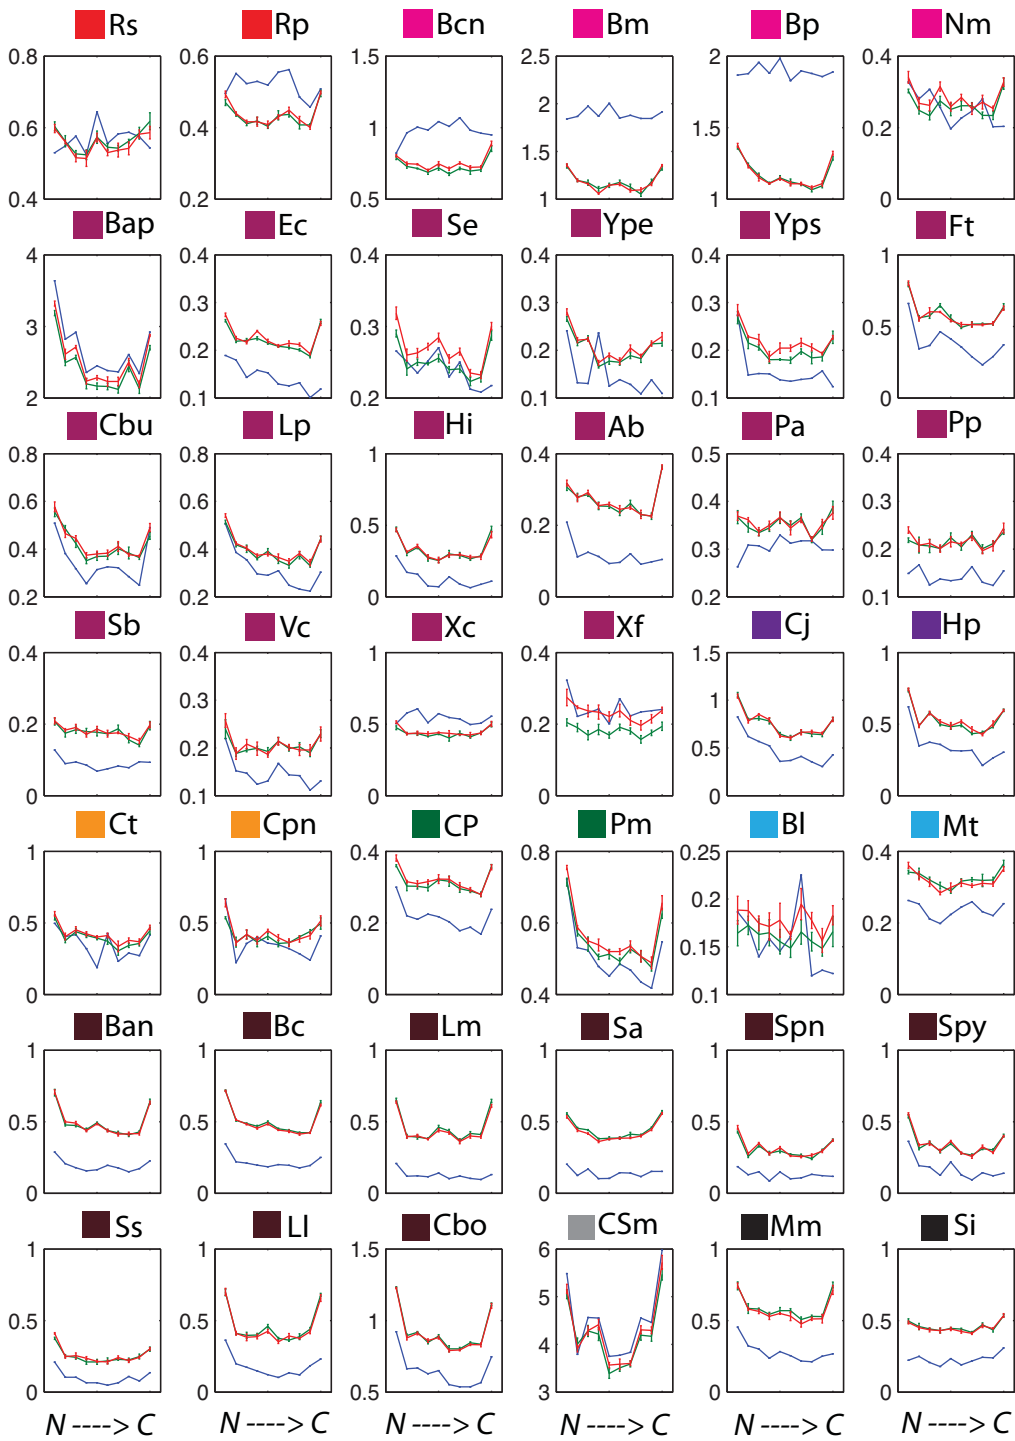

alpha-proteo

beta-proteo

gamma-proteo

epsilon-proteo

Chlamydia

Cyanobac.

Actinobac.

Firmicute

Bacteroid

Archaea

Supplemental Figure 4A

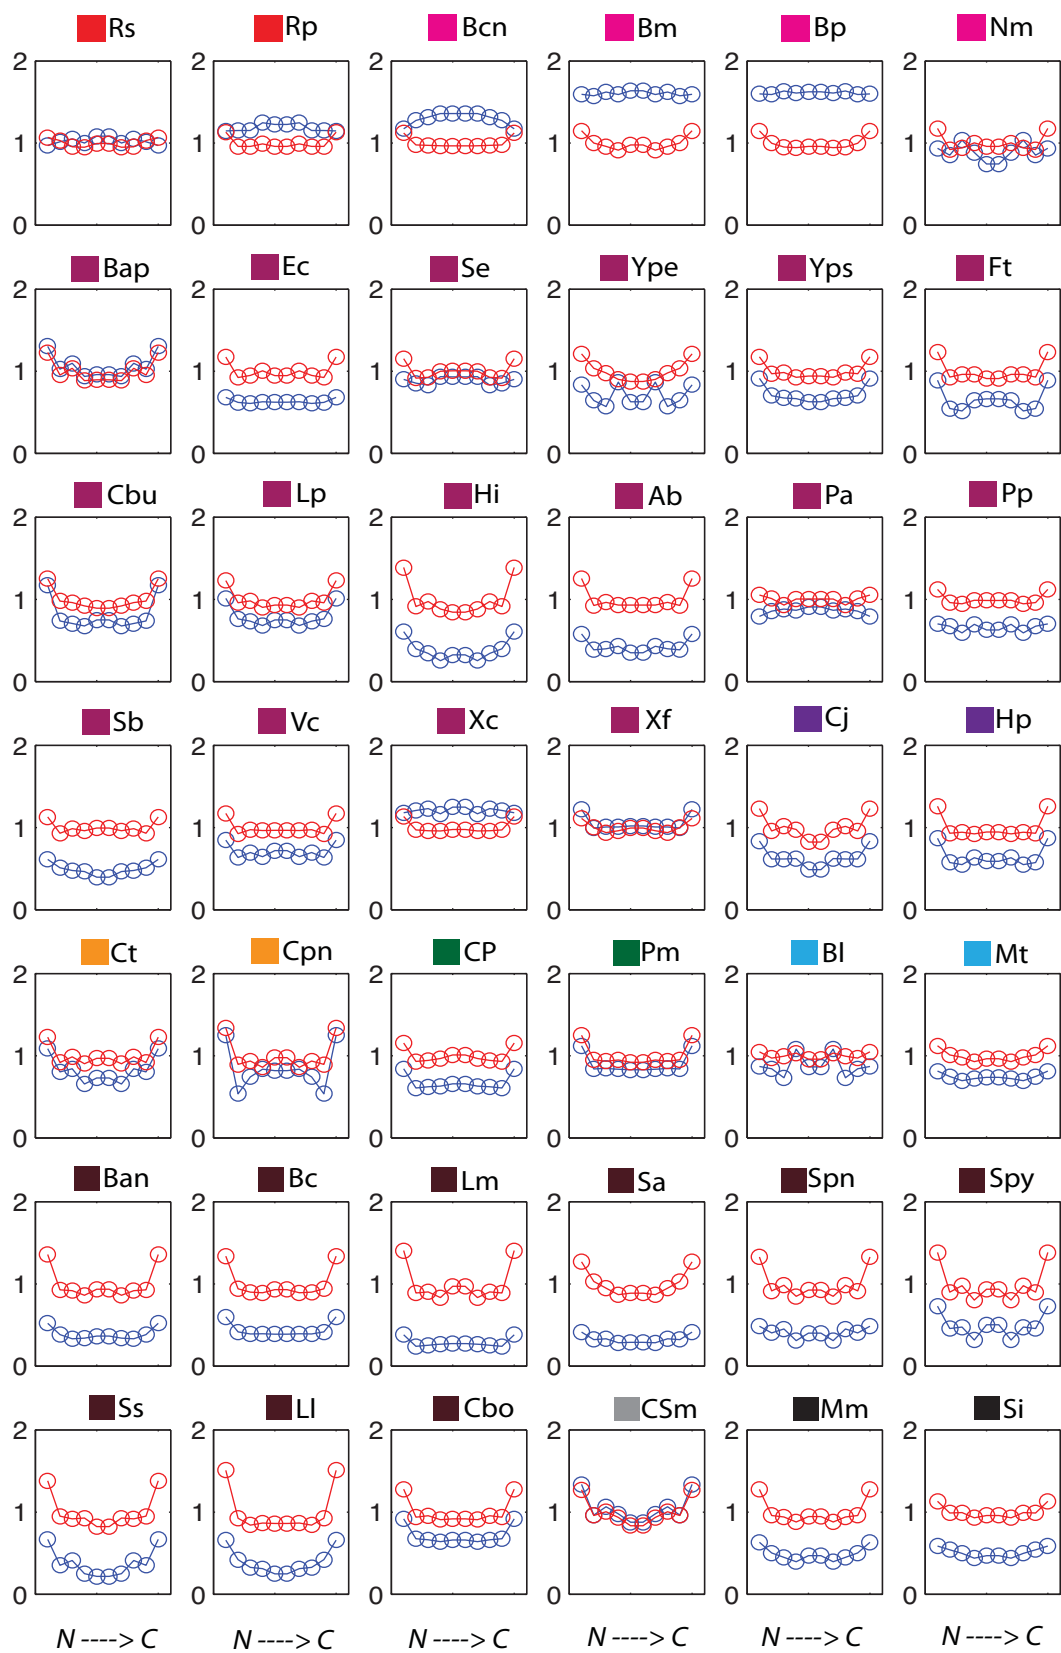

■ alpha-proteo  
■ beta-proteo  
■ gamma-proteo  
■ epsilon-proteo

■ Chlamydia  
■ Cyanobac.  
■ Actinobac.

■ Firmicute  
■ Bacteroid  
■ Archaea



Supplemental Figure 4B

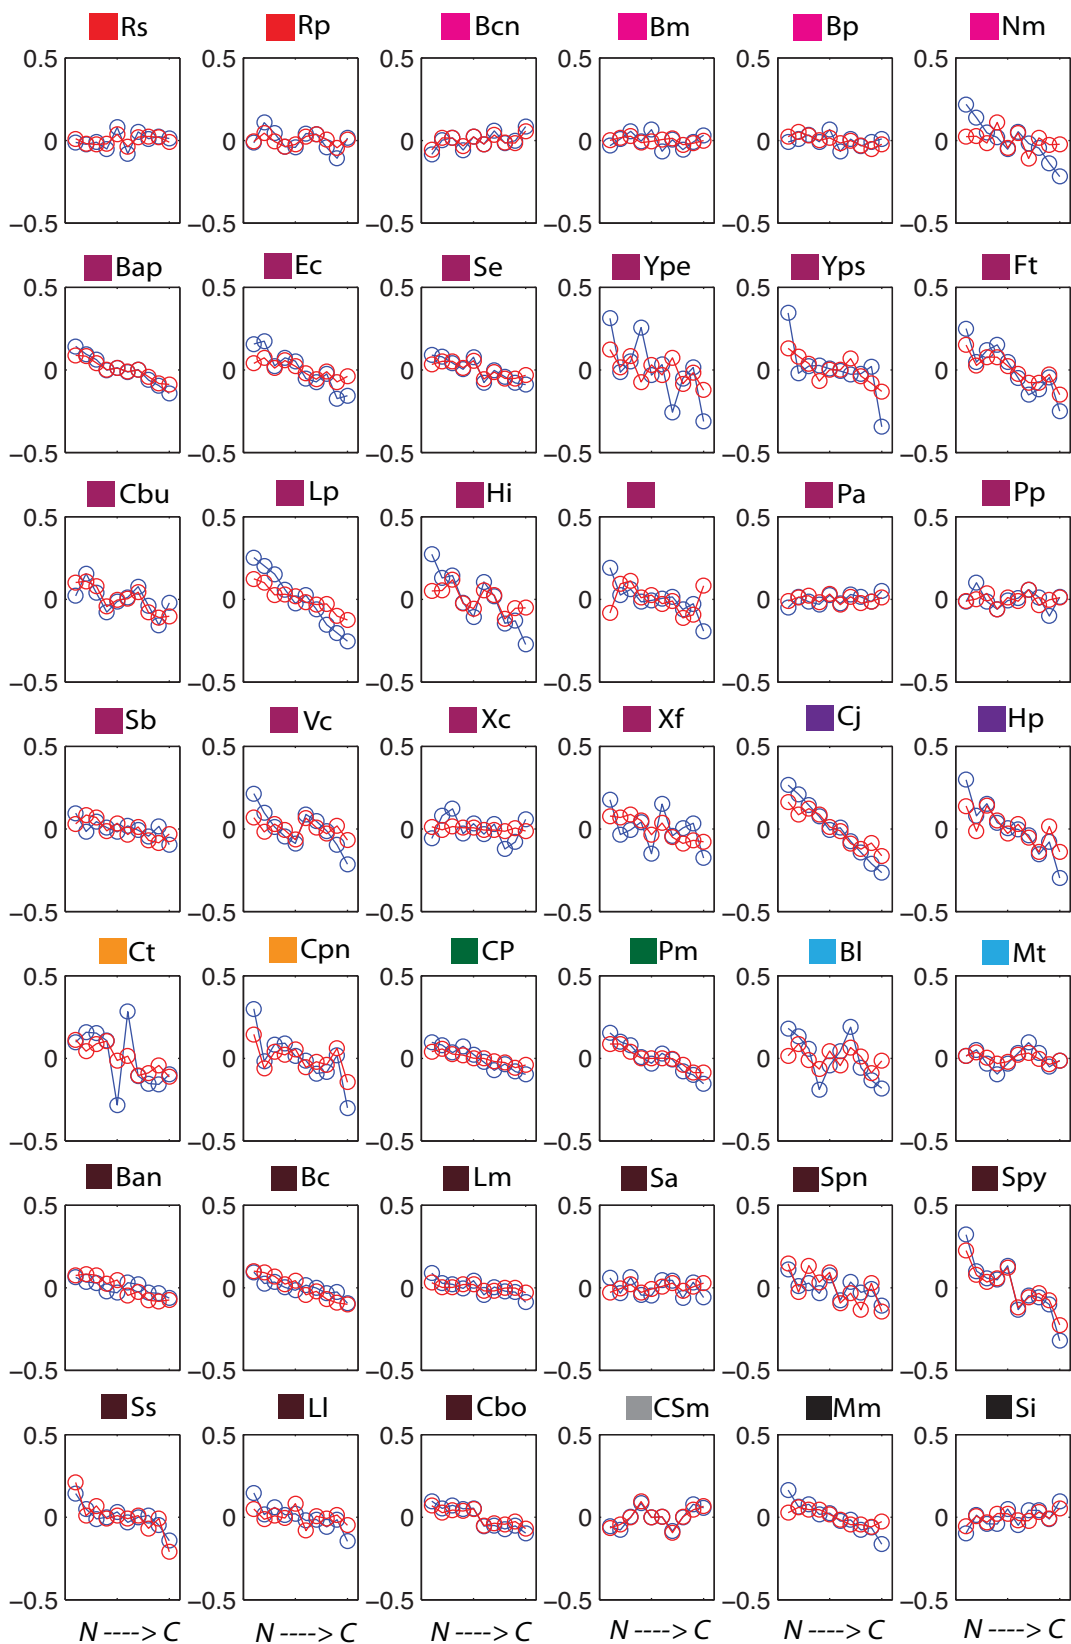

alpha-proteo

beta-proteo

gamma-proteo

epsilon-proteo

Chlamydia

Cyanobac.

Actinobac.

Firmicute

Bacteroid

Archaea

## Step I

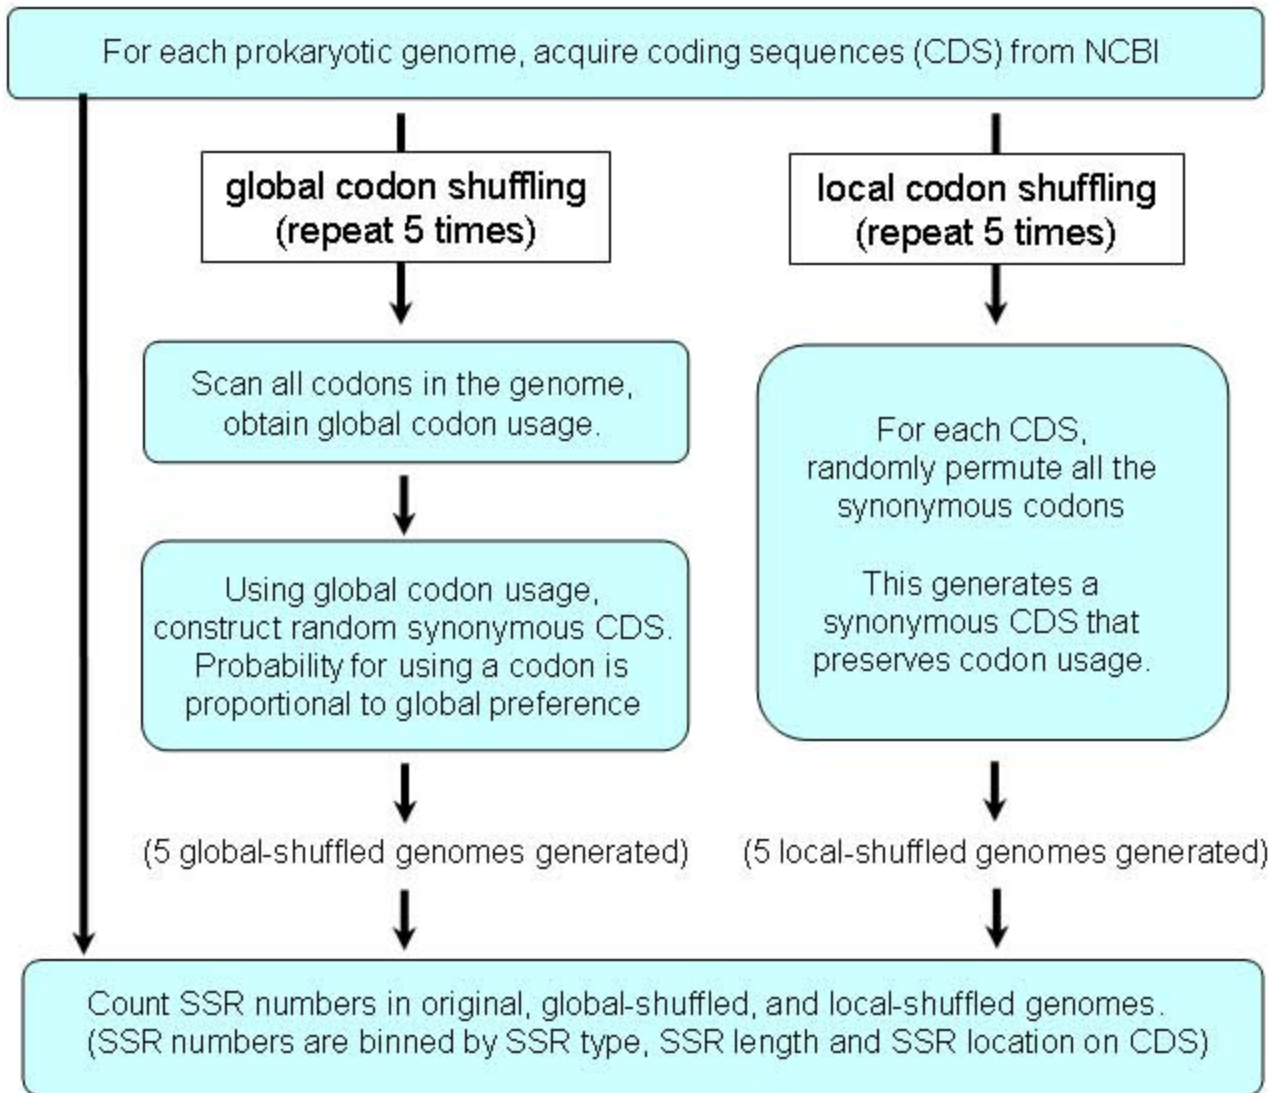

## Step II

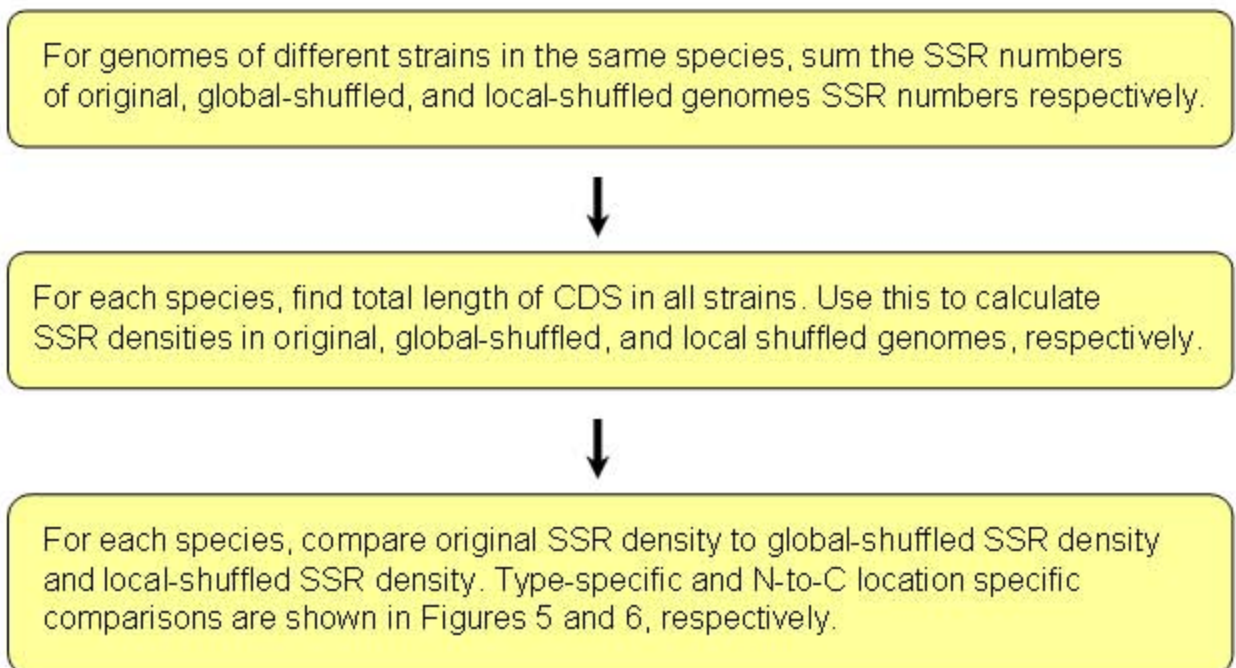

Supplement: supp_gkr1078_nar-02231-n-2011-File008.pdf [file supp_gkr1078_nar-02231-n-2011-File008.pdf]
